# Supplementary material for: Computational design of small transcription activating RNAs for versatile and dynamic gene regulation
Source: PubMed Central journal article supplement (PMC5648800; doi:10.1038/s41467-017-01082-6), 2017-10-19
Supplement: 41467_2017_1082_MOESM3_ESM.pdf [file 41467_2017_1082_MOESM3_ESM.pdf]

## **Description of Additional Supplementary Files**

### **File Name: Supplementary Data 1**

Description: Plasmids used in this study.

### **File Name: Supplementary Data 2**

Description: Examples of DNA plasmid sequences

### **File Name: Supplementary Data 3**

Description: Sequences of targets RNAs used in this study

### **File Name: Supplementary Data 4**

Description: Sequences of STARs used in this study
